# Supplementary material for: Hepatic Fasting-Induced PPARα Activity Does Not Depend on Essential Fatty Acids
Source: PubMed Central journal article supplement (PMC5085657; doi:10.3390/ijms17101624), 2016-09-24
Supplement: ijms-17-01624-s001.pdf [file ijms-17-01624-s001.pdf]

# Supplementary Materials: Hepatic Fasting-Induced PPAR $\alpha$ Activity Does Not Depend on Essential Fatty Acids

Arnaud Polizzi, Edwin Fouché, Simon Ducheix, Frédéric Lasserre, Alice P. Marmugi, Laila Mselli-Lakhal, Nicolas Loiseau, Walter Wahli, Hervé Guillou and Alexandra Montagner

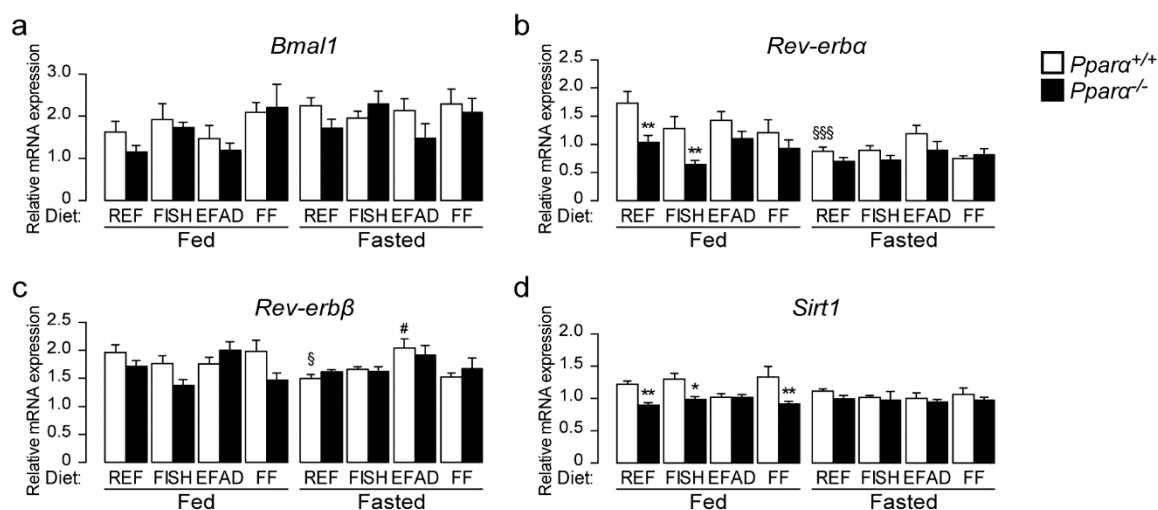

**Figure S1.** Effect of dietary fat on hepatic gene expression. Wild-type (*Ppara*<sup>+/+</sup>) and total *Ppara* knockout (*Ppara*<sup>-/-</sup>) mice were fed ad libitum or fasted for 24 h and then euthanized at ZT14. Quantification of *Bmal1* (a); *Rev-erba* (b); *Rev-erbβ* (c); and *Sirt1* (d) mRNA expression levels in the liver as determined by qRT-PCR. Data were normalized to the expression of TATA-binding protein (TBP). Data represent mean  $\pm$  SEM. \* significant genotype effect, # significant effect of diet composition, § significant effect of fasting. \*, #, §  $p \leq 0.05$ . \*\*  $p \leq 0.01$ . §§§  $p \leq 0.001$ . REF: standard diet; FISH: diet enriched in n-3 essential fatty acids from fish oil; EFAD: essential fatty acid-deficient diet; FF: fat-free diet.

**Table S1.** Liver composition in FA from liver of wild-type (*Ppara*<sup>+/+</sup>) and total *Ppara* knockout (*Ppara*<sup>-/-</sup>) mice were fed ad libitum or fasted for 24 h and killed at ZT14. Transmethylated fatty acids from liver lipid extract were quantified by gas chromatography. Data shown as mean ± SEM. \* significant genotype effect, # significant effect of diet composition, § significant effect of fasting. \*, #, §  $p \leq 0.01$ , \*\*, ##, §§  $p \leq 0.001$ . REF: standard diet; FISH: diet enriched in n-3 essential fatty acids from fish oil; EFAD: essential fatty acids deficient diet; FF: fat free diet.

|           | Fed                         |                             |                             |                             |                             |                             |                             |                             |
|-----------|-----------------------------|-----------------------------|-----------------------------|-----------------------------|-----------------------------|-----------------------------|-----------------------------|-----------------------------|
|           | REF                         |                             | FISH                        |                             | EFAD                        |                             | FF                          |                             |
|           | <i>Ppara</i> <sup>+/+</sup> | <i>Ppara</i> <sup>-/-</sup> | <i>Ppara</i> <sup>+/+</sup> | <i>Ppara</i> <sup>-/-</sup> | <i>Ppara</i> <sup>+/+</sup> | <i>Ppara</i> <sup>-/-</sup> | <i>Ppara</i> <sup>+/+</sup> | <i>Ppara</i> <sup>-/-</sup> |
| C14:0     | 0.19 ± 0.044                | 0.51 ± 0.029 **             | 0.02 ± 0.008 ##             | 0.35 ± 0.082 **             | 0.61 ± 0.11 ##              | 1.99 ± 0.07 **,#            | 0.12 ± 0.022                | 0.61 ± 0.039 **             |
| C16:0     | 19.9 ± 0.99                 | 21.8 ± 0.85                 | 18.4 ± 1.01                 | 24.9 ± 1.76 **              | 20.9 ± 0.56                 | 23.1 ± 0.72                 | 18 ± 0.6                    | 23.1 ± 0.86 **              |
| C16:1 n-9 | 0.85 ± 0.049                | 1.19 ± 0.121                | 0.99 ± 0.069                | 1.09 ± 0.147                | 0.93 ± 0.156                | 1.28 ± 0.069                | 1.36 ± 0.082                | 1.56 ± 0.205                |
| C16:1 n-7 | 2.1 ± 0.18                  | 4.5 ± 0.32 **               | 1.8 ± 0.43                  | 3.8 ± 0.73 **               | 4.6 ± 0.31 ##               | 10.5 ± 0.48 **,#            | 4.1 ± 0.23 ##               | 8.7 ± 0.78 **,#             |
| C18:0     | 10.2 ± 0.43                 | 4.4 ± 0.57 **               | 10.7 ± 0.98                 | 8.3 ± 1.84                  | 7.3 ± 0.68                  | 2.7 ± 0.3 **                | 7.3 ± 0.64                  | 5.5 ± 1.61                  |
| C18:1 n-9 | 23.2 ± 1.27                 | 34.9 ± 0.9 **               | 18.9 ± 2.38                 | 26.4 ± 3.51 *,##            | 34.5 ± 1.71 ##              | 38.1 ± 0.76                 | 38.9 ± 1.58 ##              | 38.7 ± 1.47                 |
| C18:1 n-7 | 4.6 ± 0.29                  | 6.4 ± 0.31 *                | 2.8 ± 0.34 ##               | 3.7 ± 0.45 ##               | 10.3 ± 0.43 ##              | 14.8 ± 0.52 **,#            | 11.5 ± 0.26 ##              | 16.5 ± 0.88 *,##            |
| C18:2 n-6 | 13 ± 0.34                   | 17.4 ± 1.07                 | 11.3 ± 0.8                  | 15.4 ± 1.09                 | 3.5 ± 0.37 ##               | 2.4 ± 0.26 ##               | 2.1 ± 0.3 ##                | 2 ± 0.3 ##                  |
| C18:3 n-6 | 0.26 ± 0.014                | 0.15 ± 0.027 *              | 0.1 ± 0.018 ##              | 0.06 ± 0.004 ##             | 0.07 ± 0.01 ##              | 0.03 ± 0.006 **,#           | 0.04 ± 0.006 ##             | 0.02 ± 0.004 ##             |
| C18:3 n-3 | 0.21 ± 0.021                | 0.67 ± 0.042 **             | 0.33 ± 0.017 #              | 0.95 ± 0.104 **             | 0.08 ± 0.017 ##             | 0.13 ± 0.01 **,#            | 0.2 ± 0.03                  | 0.11 ± 0.011 *,##           |
| C20:0     | 0.74 ± 0.171                | 0.81 ± 0.161                | 0.26 ± 0.054                | 0.28 ± 0.027                | 0.81 ± 0.184                | 0.77 ± 0.174                | 0.06 ± 0.009 #              | 0.02 ± 0.002 ##             |
| C20:1 n-9 | 0.41 ± 0.084                | 0.55 ± 0.058 *              | 0.55 ± 0.034                | 0.71 ± 0.055                | 0.93 ± 0.068 ##             | 0.92 ± 0.088 #              | 1.41 ± 0.1 ##               | 0.78 ± 0.085 *              |
| C20:2 n-6 | 0.47 ± 0.048                | 0.32 ± 0.042                | 0.34 ± 0.03                 | 0.21 ± 0.035                | 2.88 ± 0.424 ##             | 0.41 ± 0.074 **             | 4.34 ± 0.415 ##             | 0.23 ± 0.041 **             |
| C20:3 n-9 | 0.0081 ± 0.0017             | 0.0094 ± 0.0024             | 0.0046 ± 0.0016             | 0.0012 ± 0.0005             | 0.11 ± 0.016 ##             | 0.032 ± 0.0064 #            | 0.1506 ± 0.0126 ##          | 0.0097 ± 0.0016 *           |
| C20:3 n-6 | 1.68 ± 0.081                | 0.41 ± 0.064 **             | 1.46 ± 0.119                | 0.33 ± 0.109 **             | 1.09 ± 0.144 #              | 0.19 ± 0.031 **,#           | 0.66 ± 0.104 ##             | 0.13 ± 0.02 **,#            |
| C20:4 n-6 | 13.9 ± 0.71                 | 3.2 ± 0.65 **               | 6.3 ± 0.8 ##                | 1.7 ± 0.99 **,#             | 6.9 ± 0.77 ##               | 1.4 ± 0.2 **,#              | 5.6 ± 0.64 ##               | 1 ± 0.2 **,#                |
| C20:5 n-3 | 0.1 ± 0.011                 | 0.09 ± 0.014                | 4.49 ± 0.509 ##             | 2.47 ± 0.603 ##             | 0.03 ± 0.007 ##             | 0.01 ± 0.003 ##             | 0.01 ± 0.006 ##             | 0.01 ± 0.003 ##             |
| C22:4 n-6 | 0.48 ± 0.063                | 0.18 ± 0.04 **              | 0.09 ± 0.015 ##             | 0.07 ± 0.014 #              | 0.15 ± 0.028 ##             | 0.03 ± 0.005 **,#           | 0.09 ± 0.016 ##             | 0.02 ± 0.006 **,#           |
| C22:5 n-6 | 0.76 ± 0.195                | 0.13 ± 0.031 **             | 0.08 ± 0.016 ##             | 0.05 ± 0.007 #              | 0.85 ± 0.178                | 0.19 ± 0.019 **             | 0.87 ± 0.07                 | 0.12 ± 0.028 **             |
| C22:5 n-3 | 0.23 ± 0.013                | 0.12 ± 0.021 *              | 1.92 ± 0.082 ##             | 1.94 ± 0.311 ##             | 0.04 ± 0.008 ##             | 0.01 ± 0.002 **,#           | 0.01 ± 0.006 ##             | 0 ± 0.001 ##                |
| C22:6 n-3 | 6.3 ± 0.41                  | 1.7 ± 0.37 **               | 18.7 ± 1.75 ##              | 6.9 ± 2.28 **,#             | 2.9 ± 0.3 ##                | 0.6 ± 0.09 **,#             | 2.7 ± 0.32 ##               | 0.4 ± 0.09 **,#             |

Table S2. Cont.

|           | Fasted                      |                             |                             |                             |                             |                             |                             |                             |
|-----------|-----------------------------|-----------------------------|-----------------------------|-----------------------------|-----------------------------|-----------------------------|-----------------------------|-----------------------------|
|           | REF                         |                             | FISH                        |                             | EFAD                        |                             | FF                          |                             |
|           | <i>Ppara</i> <sup>+/+</sup> | <i>Ppara</i> <sup>-/-</sup> | <i>Ppara</i> <sup>+/+</sup> | <i>Ppara</i> <sup>-/-</sup> | <i>Ppara</i> <sup>+/+</sup> | <i>Ppara</i> <sup>-/-</sup> | <i>Ppara</i> <sup>+/+</sup> | <i>Ppara</i> <sup>-/-</sup> |
| C14:0     | 0.35 ± 0.043 §§             | 0.53 ± 0.077                | 0.36 ± 0.033 §§             | 0.55 ± 0.027                | 1.3 ± 0.084 ##§             | 1.96 ± 0.126 ##             | 0.47 ± 0.052 §§             | 0.83 ± 0.037                |
| C16:0     | 20.8 ± 0.62                 | 18 ± 0.78 §                 | 22.7 ± 0.57 §               | 25.4 ± 1.15 ##              | 20.7 ± 0.43                 | 19.9 ± 0.21                 | 20.4 ± 0.29                 | 20.3 ± 1.1                  |
| C16:1 n-9 | 1.14 ± 0.138                | 1.32 ± 0.113                | 1.13 ± 0.068                | 1.13 ± 0.132                | 1.26 ± 0.063                | 1.1 ± 0.115                 | 1.53 ± 0.121                | 1.74 ± 0.12                 |
| C16:1 n-7 | 4.6 ± 0.34 §§               | 7.2 ± 0.52 *§               | 4.4 ± 0.08 §§               | 4.6 ± 0.28 #                | 11.7 ± 0.44 ##,§§           | 17.4 ± 1.02 *,##,§§         | 8.3 ± 0.68 ##,§§            | 11.6 ± 1.68 #               |
| C18:0     | 3.8 ± 0.3 §§                | 3.5 ± 0.57                  | 3.9 ± 0.21 §                | 5.7 ± 1.27                  | 3.4 ± 0.17 §                | 2.9 ± 0.65                  | 4.4 ± 0.81                  | 5.7 ± 2.38                  |
| C18:1 n-9 | 34.6 ± 1.46 §§              | 36.5 ± 0.71                 | 23.9 ± 0.87 ##              | 29.4 ± 2.02                 | 40.5 ± 0.52                 | 38.8 ± 0.72                 | 41.3 ± 1.23                 | 40.5 ± 1.66                 |
| C18:1 n-7 | 3.4 ± 0.22 §                | 4.9 ± 0.4 *                 | 1.9 ± 0.25 ##,§             | 3.1 ± 0.36 *,##             | 6.1 ± 0.48 ##,§§            | 11.5 ± 0.98 **,##           | 6.5 ± 0.36 ##,§§            | 14.5 ± 0.54 *,##            |
| C18:2 n-6 | 18 ± 1.11                   | 21.8 ± 1.08                 | 18.9 ± 0.73 §               | 16.3 ± 0.91                 | 3.8 ± 0.27 ##               | 2.8 ± 0.22 ##               | 3.8 ± 0.3 ##,§              | 2.4 ± 0.72 *,##             |
| C18:3 n-6 | 0.78 ± 0.125 §§             | 0.46 ± 0.05 §§              | 0.28 ± 0.046 ##,§§          | 0.1 ± 0.017 **,##           | 0.39 ± 0.046 ##,§§          | 0.18 ± 0.02 **,##,§§        | 0.31 ± 0.037 ##,§§          | 0.12 ± 0.037 **,##,§§       |
| C18:3 n-3 | 0.55 ± 0.038 §§             | 1.02 ± 0.064 **,§           | 0.88 ± 0.056 ##,§§          | 1.14 ± 0.067                | 0.07 ± 0.007 ##             | 0.11 ± 0.013*,##            | 0.09 ± 0.007 ##,§§          | 0.12 ± 0.007##              |
| C20:0     | 0.37 ± 0.1                  | 0.47 ± 0.115                | 0.05 ± 0.004                | 0.35 ± 0.066                | 0.49 ± 0.151                | 0.42 ± 0.107                | 0.02 ± 0.005 #              | 0.01 ± 0.003 #              |
| C20:1 n-9 | 0.25 ± 0.028                | 0.37 ± 0.039                | 0.31 ± 0.034 §              | 0.67 ± 0.052 *,#            | 0.32 ± 0.014 §§             | 0.62 ± 0.038 *,#            | 0.45 ± 0.072 #,§§           | 0.59 ± 0.083                |
| C20:2 n-6 | 0.24 ± 0.01 §§              | 0.22 ± 0.017                | 0.12 ± 0.012 #,§§           | 0.15 ± 0.014                | 1.95 ± 0.176 ##             | 0.27 ± 0.02 **              | 2.16 ± 0.338 ##,§           | 0.16 ± 0.011 **             |
| C20:3 n-9 | 0.002 ± 0.0003              | 0.0039 ± 0.0009             | 0.0021 ± 0.0005             | 0.001 ± 0.0006              | 0.0576 ± 0.0153 ##          | 0.0129 ± 0.0019             | 0.0508 ± 0.0192 ##          | 0.0042 ± 0.0007             |
| C20:3 n-6 | 0.39 ± 0.021 §§             | 0.17 ± 0.012 **,§§          | 0.41 ± 0.042 §§             | 0.18 ± 0.016 **             | 0.42 ± 0.033 §§             | 0.06 ± 0.004 **,##,§§       | 0.38 ± 0.069 §              | 0.03 ± 0.004 *,##,§§        |
| C20:4 n-6 | 5.7 ± 0.41 §§               | 1.6 ± 0.14 **               | 2.6 ± 0.14 ##,§             | 0.7 ± 0.05 *,##             | 4 ± 0.14                    | 0.9 ± 0.05 **,#             | 5.6 ± 0.77                  | 0.6 ± 0.11 **,##            |
| C20:5 n-3 | 0.15 ± 0.012                | 0.08 ± 0.007                | 3.46 ± 0.152 ##             | 2.27 ± 0.366 ##             | 0.02 ± 0.002 ##             | 0.01 ± 0.001 ##             | 0.02 ± 0.002 ##             | 0 ± 0.001 *,##              |
| C22:4 n-6 | 0.19 ± 0.014 §              | 0.13 ± 0.018                | 0.04 ± 0.004 ##             | 0.05 ± 0.007                | 0.14 ± 0.036                | 0.02 ± 0.004 **,##          | 0.08 ± 0.011 #              | 0.01 ± 0.005 **,##          |
| C22:5 n-6 | 0.2 ± 0.02 §§               | 0.08 ± 0.018 **             | 0.06 ± 0.006 ##             | 0.05 ± 0.006                | 0.73 ± 0.146 ##             | 0.1 ± 0.006 **              | 0.59 ± 0.104 ##             | 0.07 ± 0.007 **             |
| C22:5 n-3 | 0.26 ± 0.025                | 0.11 ± 0.012 *              | 1.65 ± 0.094 ##             | 1.94 ± 0.332 ##             | 0.09 ± 0.013 ##,§           | 0.01 ± 0.001 **,##          | 0.07 ± 0.001 ##,§§          | 0.01 ± 0.003 **,##          |
| C22:6 n-3 | 3.8 ± 0.26                  | 1 ± 0.09 **                 | 12.5 ± 0.7 ##               | 5.7 ± 0.89 *,##             | 2.1 ± 0.09 #                | 0.3 ± 0.02 **,##            | 3.1 ± 0.39                  | 0.2 ± 0.03 **,##            |

**Table S2.** Diet compositions.

| % (w/w)   | Fat Free Diet (FF) | CTRL, FISH, EFAD Diets |
|-----------|--------------------|------------------------|
| Cellulose | 2                  | 2                      |
| Casein    | 22                 | 22                     |
| Starch    | 46.2               | 43.5                   |
| Methionin | 0.2                | 0.2                    |
| Sucrose   | 23.1               | 21.8                   |
| Minerals  | 4.5                | 4.5                    |
| Vitamins  | 1                  | 1                      |
| Oil       | 0                  | 5                      |
| Agar-Agar | 1                  | 0                      |

**Table S3.** Relative fatty acid composition of dietary oils.

| Diet   | REF  | EFAD | FISH |
|--------|------|------|------|
| 12:00  | 0    | 47.7 | 0    |
| 14:00  | 0    | 23   | 0    |
| 16:00  | 5.9  | 13.1 | 4.4  |
| 18:00  | 2.8  | 15.3 | 2.1  |
| 18:1w9 | 39.7 | 0.9  | 30.5 |
| 18:2w6 | 47.0 | 0    | 34.7 |
| 18:3w3 | 4.6  | 0    | 3.4  |
| 20:5w3 | 0    | 0    | 5.3  |
| 22:6w3 | 0    | 0    | 19.5 |

**Table S4.** Oligonucleotide sequences for the real time PCR. Oligonucleotides (Sigma Aldrich, St. Louis, MO, USA) were designed with Primer Express 2.0 software (Applied Biosystems, Foster City, CA, USA).

| Gene           | NCBI Refseq  | Forward Primer (5'-3')        | Reverse Primer (5'-3')       |
|----------------|--------------|-------------------------------|------------------------------|
| <i>Acly</i>    | NM_134037    | AAAGCTTGGCCTCGTCGG            | GGGACGAAGGGTTCAATGAGA        |
| <i>Acox1</i>   | NM_015729    | CAGACCCTGAAGAAATCATGTGG       | CAGGAACATGCCAAAGTGAAG        |
| <i>Alas1</i>   | NM_020559    | CAAAGAAACCCCTCCAGCC           | GCTGTGTGCCGTCTGGAGT          |
| <i>Bien</i>    | NM_023737    | CGTCTCCTCGGTGTGGTTC           | ATTATCTTCTTGCAGTATCTAGCTGCTT |
| <i>Bmal1</i>   | NM_007489    | CAAACACTACAAGCCAACATTTCATCAG  | TCGGTCACATCCTACGACAAAC       |
| <i>Cd36</i>    | NM_007643    | GITAAACAAAGAGGTCCTTACACATACAG | CAGTGAAGGCTCAAAGATGGC        |
| <i>Chrebp</i>  | NM_021455    | ACTCAGGGAATACAGCCTACAG        | GAAGAAGGAATTCAGAGCTCAGAAA    |
| <i>Cpt1a</i>   | NM_013495    | GAAGAAGAAGTTCATCCGATTCAAG     | GATATCACACCCACCACCAG         |
| <i>Cyp4a10</i> | NM_010011    | TCCAGCAGTTCATCACCT            | TTGCTTCCCCAGAACCATCT         |
| <i>Cyp4a14</i> | NM_007822    | TCAGTCTATTCTGGTGCTGTC         | GAGCTCCTTGCTTCAGATGGT        |
| <i>Eci</i>     | NM_010023    | GTTCCACATCAGCCTGGAGAAG        | AGAAGATACCCGGGCATCC          |
| <i>Fasn</i>    | NM_007988    | AGTCAGCTATGAAGCAATTGTGGA      | CACCCAGACGCCAGTGTTC          |
| <i>Fgf21</i>   | NM_020013    | AAAGCCTCTAGGTTCTTTGCCA        | CCTCAGGATCAAAGTGAGGGC        |
| <i>Fsp27</i>   | NM_178373    | CATGAAGTCTCTCAGCCTCTGTA       | CAGCTGTTGGGTCACCACTG         |
| <i>Hmgcr</i>   | NM_008255    | CTGTGGAAATGCCTTGTGATTG        | GAAGAATGTCATGAACACAAAGTAGTGG |
| <i>Hmgcs2</i>  | NM_008256    | TGCAGGAAACTTCGCTCACA          | AAATAGACCTCCAGGGCAAGGA       |
| <i>Insig2</i>  | NM_133748    | TGTATATTTTTTGTGGAGGCATAAC     | TTCAGCAATAACTTTGCATTCATACAT  |
| <i>Lpk</i>     | NM_013631    | TCGACTCAGAGCCTGTGGC           | AGTCGTGCAATGTTTCATCCT        |
| <i>Lxra</i>    | NM_013839    | GGAGTGTGCACTTCGCAAATG         | TCAAGCGGATCTGTTCTTCTGAC      |
| <i>Lxrb</i>    | NM_009473    | ATGCGGGAGCAGTGCCG             | CCGGCCTGAGCTGCTG             |
| <i>Me1</i>     | NM_008615    | CATTTCGAGGCGTTTCGTTG          | CAGGTAGGATCTGGTCATAATTAGTGC  |
| <i>Pdk4</i>    | NM_013743    | ATCGCCAGAATTAACCTCACAC        | TGGATTGGTTGGCCTGGA           |
| <i>Pepck</i>   | NM_011044    | GAACCCAGCCTGCCC               | GAGCAACTCCAAAAAACCCG         |
| <i>Plin2</i>   | NM_007408    | CCATTTCTCAGTCCACTCCAC         | GTGTCGTAGCCGATGC             |
| <i>Pnpla2</i>  | NM_001163689 | AGTGTCTTACCATCCGCTT           | GGATATCTTCAGGACATACAGGC      |
| <i>Pnpla3</i>  | NM_054088    | ACGCGGTACCTTCGTGT             | AGCCCGTCTCTGATGCACTT         |
| <i>Ppara</i>   | NM_011144    | CCCTGTTTGTGGCTGCTATAATTT      | GGGAAGAGGAAGGTGTCATCTG       |
| <i>Pparb</i>   | NM_011145    | AAGTGGCCATGGGTGACG            | TGGTCCAGCAGGGAGGAAG          |
| <i>Pparg2</i>  | NM_011146    | ATGGGTGAAACTCTGGGAGATTCT      | CTTGGAGCTTCAGGTCATATTGTA     |
| <i>Reverba</i> | NM_145434    | CAGCTGGTGAAGACATGACGAC        | GGAGGAGCCACTAGAGCCAA         |
| <i>Reverbb</i> | NM_011584    | CGCCATGGAGCTGAACG             | GACAAGAGGCAGGGCTGGA          |
| <i>Scd1</i>    | NM_009127    | CAGTGCCGCGCATCTCTAT           | CTGACTGGCAAATATAGCTGTATCCT   |
| <i>Spot14</i>  | NM_009381    | AACGGAGGAGGCCGAAGAAG          | GTTGATGCACCTCGGGTCT          |
| <i>Tbp</i>     | NM_013684    | ACTTCTGTCAAGAAATGCTGAA        | GCAGTTGTCCGTTGGCTCTCT        |
| <i>Srebp1c</i> | NM_011480    | GGAGCCATGGATTGCACATT          | GCTTCCAGAGAGGAGGCCAG         |
| <i>Thiolb</i>  | NM_146230    | ACATCTCCGTGGCAATGTG           | TGTCGTGACCGTAGACAAAGGT       |
